# Supplementary material
Source: HighWire-hosted journal article supplement (https://svn.bmj.com/content/svn-2023-002463)
Supplement: inline-supplementary-material-1 [file inline-supplementary-material-1.pdf]

**Supplement:** Li et al., Cerebral Small Vessel Disease Modifies Outcomes after Minimally Invasive Surgery for Intracerebral Haemorrhage

**Table 1. Comparison of Baseline and Demographic Characteristics Between Patients With and Without Available MRI from the MISTIE III Trial**

| Characteristic                           | MRI Available<br>(n = 288) | No MRI<br>(n = 211) | P Value |
|------------------------------------------|----------------------------|---------------------|---------|
| Surgical treatment, No. (%)              | 149 (51.7)                 | 101 (47.9)          | 0.39    |
| Age, mean (SD)                           | 60.6 (12.3)                | 61.7 (12.3)         | 0.40    |
| Sex, No. (%)                             |                            |                     | 0.71    |
| Male                                     | 174 (60.4)                 | 131 (62.1)          |         |
| Female                                   | 114 (39.6)                 | 80 (37.9)           |         |
| Race, No. (%)                            |                            |                     | 0.65    |
| White                                    | 216 (75)                   | 158 (74.9)          |         |
| Black                                    | 54 (18.8)                  | 33 (15.6)           |         |
| Other                                    | 18 (6.3)                   | 20 (9.5)            |         |
| Diabetes, No. (%)                        | 89 (30.9)                  | 49 (23.3)           | 0.11    |
| Hypertension, No. (%)                    | 278 (96.5)                 | 194 (91.9)          | 0.03    |
| Coronary artery disease, No. (%)         | 40 (13.9)                  | 14 (6.6)            | 0.01    |
| Prior ischemic stroke, No. (%)           | 8 (2.8)                    | 13 (6.2)            | 0.04    |
| Prior transient ischemic attack, No. (%) | 3 (1.0)                    | 6 (2.8)             | 0.08    |
| Atrial fibrillation, No. (%)             | 18 (6.25)                  | 14 (6.6)            | 0.25    |
| Peripheral vascular disease, No. (%)     | 5 (1.71)                   | 1 (0.5)             | 0.11    |
| Lobar ICH, No. (%)                       | 112 (38.9)                 | 80 (37.9)           | 0.83    |
| Diagnostic ICH volume, mean (SD)         | 43.7 (18.9)                | 44.5 (18.6)         | 0.54    |
| Diagnostic IVH volume, mean (SD)         | 1.9 (4.5)                  | 2.7 (7.6)           | 0.96    |
| GCS at randomization, median (IQR)       | 10 (8-13)                  | 10 (9-13)           | 0.96    |
| Mortality at 12 months, No. (%)          | 59 (20.5)                  | 51 (24.2)           | 0.20    |
| mRS 4-6 at 12 months, No. (%)            | 161 (55.9)                 | 118 (58.7)          | 0.54    |
| Trajectory, No. (%) <sup>a</sup>         |                            |                     | 0.83    |
| Trajectory A                             | 67 (23.1)                  | 48 (23.0)           |         |
| Trajectory B                             | 29 (10.0)                  | 18 (8.6)            |         |
| Trajectory C                             | 49 (16.9)                  | 31 (14.8)           |         |

Abbreviations: GCS, Glasgow Coma Scale; ICH, intracerebral hemorrhage; IVH, intraventricular hemorrhage; mRS, modified Rankin Scale.

<sup>a</sup>Trajectory A is an anterior approach through the forehead used for deep-seated ICH in the basal ganglia, trajectory B is a posterior approach with entry point through the parietal-occipital area, and trajectory C is used for lobar hematomas, with entry point through the superficial area closest to the hematoma.
